# Supplementary material for: Treatment Monitoring of a Patient with Synchronous Metastatic Angiosarcoma and Breast Cancer Using ctDNA
Source: MDPI journal article supplement (doi:10.3390/ijms25074023), 2024-04-04
Supplement: s1 [file s1]

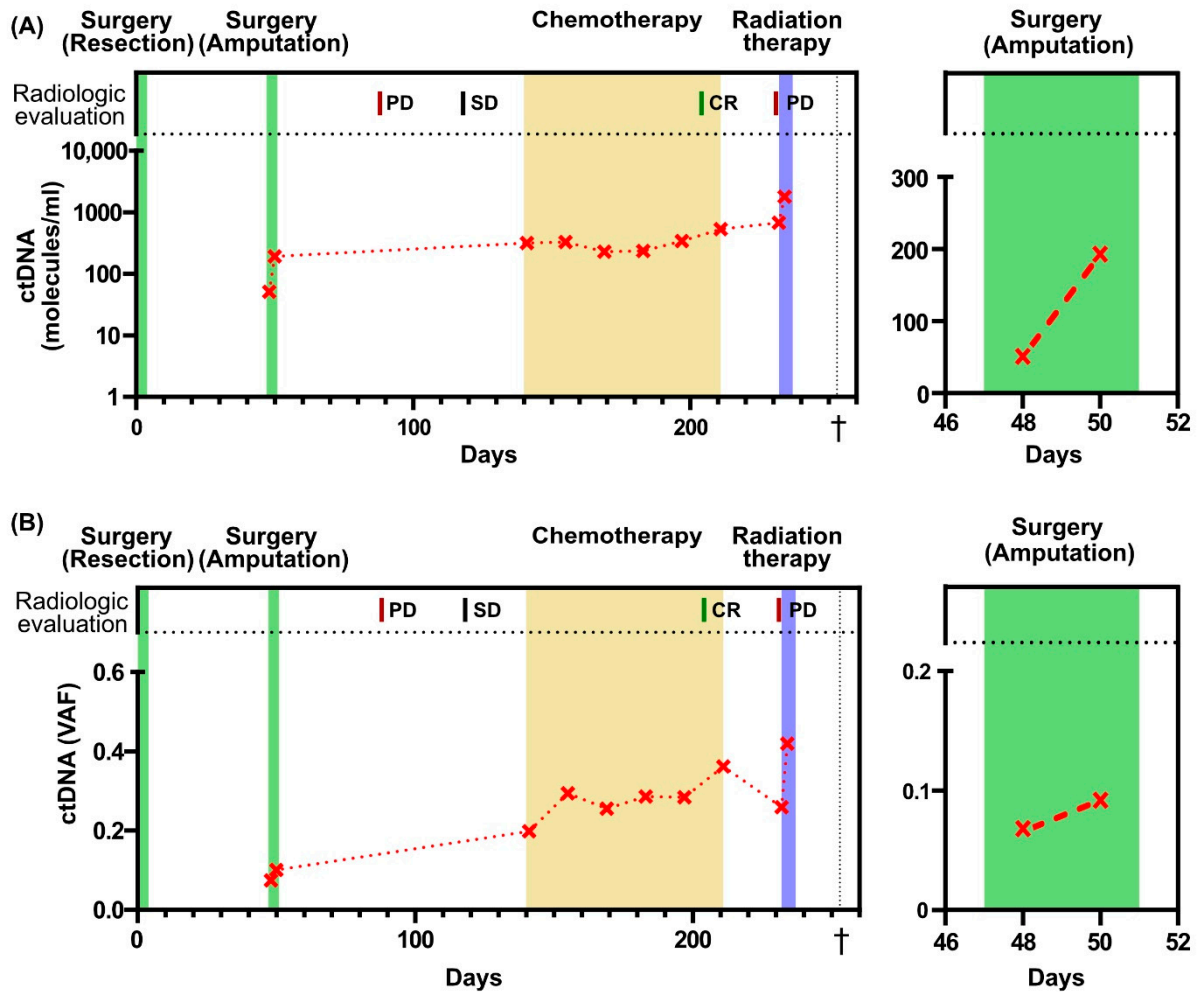

**Supplementary Figure S1 – Average levels of blood-based markers over time.** A) The average levels of circulating tumor-DNA (ctDNA) expressed as number of molecules per ml plasma. Treatments and radiological evaluations displayed at the top. On the right, a magnified view of the second surgery, spanning from day 46 to day 52. B) The average levels of ctDNA expressed as variant allele frequency (VAF). On the right, a magnified view of the second surgery, spanning from day 46 to day 52. PD, progressive disease; SD, Stable disease; CR, complete remission; PREOP2, blood sample collected the day before the second surgery; POSTOP2, blood sample collected the day after the second surgery; P1-P6, blood samples collected before each cycle of palliative chemotherapy; RT, blood sample collected the day before initiation of radiation therapy; RT-1, blood sample collected the day after initiation of radiation therapy; RX, resection; PX, tumor biopsy. The dagger (+) indicates when the patient deceased.
