# Supplementary material for: Treatment Monitoring of a Patient with Synchronous Metastatic Angiosarcoma and Breast Cancer Using ctDNA
Source: Int J Mol Sci. 2024 Apr 4;25(7):4023. doi: 10.3390/ijms25074023 (PMC11012383; doi:10.3390/ijms25074023)
Supplement: Supplementary file 1 [file ijms-25-04023-s001.zip › Supplementary Table S1.xlsx]

## Sheet: CGP
Overlap Results
Collection(s):	CGP
# overlaps shown:	10
# genesets in collections:	3438
# genes in comparison (n):	498
# genes in universe (N):	42722
Gene Set Name	# Genes in Gene Set (K)	Description	# Genes in Overlap (k)	k/K	p-value	FDR q-value
GRAESSMANN_APOPTOSIS_BY_DOXORUBICIN_DN	1776	Genes down-regulated in ME-A cells (breast cancer) undergoing apoptosis in response to doxorubicin [PubChem=31703].	77	0.0434	2.64E-23	9.08E-20
DACOSTA_UV_RESPONSE_VIA_ERCC3_DN	856	Genes down-regulated in fibroblasts expressing mutant forms of ERCC3 [GeneID=2071] after UV irradiation.	52	0.0607	3.51E-22	6.04E-19
SCHAEFFER_PROSTATE_DEVELOPMENT_48HR_DN	410	Genes down-regulated in the urogenital sinus (UGS) of day E16 females exposed to the androgen dihydrotestosterone [PubChem=10635] for 48 h.	31	0.0756	2.97E-16	3.41E-13
DACOSTA_UV_RESPONSE_VIA_ERCC3_COMMON_DN	466	Common down-regulated transcripts in fibroblasts expressing either XP/CS or TDD mutant forms of ERCC3 [GeneID=2071], after UVC irradiation.	32	0.0687	1.51E-15	1.29E-12
BLALOCK_ALZHEIMERS_DISEASE_UP	1671	Genes up-regulated in brain from patients with Alzheimer's disease.	61	0.0365	4.28E-15	2.94E-12
NABA_CORE_MATRISOME	275	Ensemble of genes encoding core extracellular matrix including ECM glycoproteins, collagens and proteoglycans	23	0.0836	2.62E-13	1.5E-10
GOBERT_OLIGODENDROCYTE_DIFFERENTIATION_DN	1087	Genes down-regulated during differentiation of Oli-Neu cells (oligodendroglial precursor) in response to PD174265 [PubChem=4709].	45	0.0414	3.17E-13	1.56E-10
RODRIGUES_THYROID_CARCINOMA_ANAPLASTIC_UP	720	Genes up-regulated in anaplastic thyroid carcinoma (ATC) compared to normal thyroid tissue.	35	0.0486	1.84E-12	7.9E-10
DAZARD_RESPONSE_TO_UV_NHEK_DN	300	Genes down-regulated in NHEK cells (normal keratinocytes) by UV-B irradiation.	22	0.0733	1.18E-11	4.5E-9
DODD_NASOPHARYNGEAL_CARCINOMA_DN	1405	Genes down-regulated in nasopharyngeal carcinoma (NPC) compared to the normal tissue.	49	0.0349	1.32E-11	4.52E-9

## Sheet: Hallmark
Overlap Results
Collection(s):	H
# overlaps shown:	10
# genesets in collections:	50
# genes in comparison (n):	498
# genes in universe (N):	42722
Gene Set Name	# Genes in Gene Set (K)	Description	# Genes in Overlap (k)	k/K	p-value	FDR q-value
HALLMARK_EPITHELIAL_MESENCHYMAL_TRANSITION	200	Genes defining epithelial-mesenchymal transition, as in wound healing, fibrosis and metastasis.	15	0.0750	1.65E-8	8.26E-7
HALLMARK_IL2_STAT5_SIGNALING	199	Genes up-regulated by STAT5 in response to IL2 stimulation.	10	0.0503	1.27E-4	3.18E-3
HALLMARK_UV_RESPONSE_DN	144	Genes down-regulated in response to ultraviolet (UV) radiation.	8	0.0556	3.04E-4	5.07E-3
HALLMARK_APICAL_JUNCTION	200	Genes encoding components of apical junction complex.	8	0.0400	2.54E-3	1.89E-2
HALLMARK_KRAS_SIGNALING_UP	200	Genes up-regulated by KRAS activation.	8	0.0400	2.54E-3	1.89E-2
HALLMARK_MYOGENESIS	200	Genes involved in development of skeletal muscle (myogenesis).	8	0.0400	2.54E-3	1.89E-2
HALLMARK_FATTY_ACID_METABOLISM	158	Genes encoding proteins involved in metabolism of fatty acids.	7	0.0443	2.64E-3	1.89E-2
HALLMARK_SPERMATOGENESIS	135	Genes up-regulated during production of male gametes (sperm), as in spermatogenesis.	6	0.0444	5.17E-3	3.01E-2
HALLMARK_PROTEIN_SECRETION	96	Genes involved in protein secretion pathway.	5	0.0521	5.41E-3	3.01E-2
HALLMARK_ANDROGEN_RESPONSE	101	Genes defining response to androgens.	5	0.0495	6.69E-3	3.34E-2

## Sheet: Biological processes
Overlap Results
Collection(s):	GO:BP
# overlaps shown:	10
# genesets in collections:	7647
# genes in comparison (n):	498
# genes in universe (N):	42722
Gene Set Name	# Genes in Gene Set (K)	Description	# Genes in Overlap (k)	k/K	p-value	FDR q-value
GOBP_NEUROGENESIS	1715	Generation of cells within the nervous system. [GO_REF:0000021, GOC:cls, GOC:curators, GOC:dgh, GOC:dph, GOC:jid]	72	0.0420	5.13E-21	3.92E-17
GOBP_CELL_PROJECTION_ORGANIZATION	1623	A process that is carried out at the cellular level which results in the assembly, arrangement of constituent parts, or disassembly of a prolongation or process extending from a cell, e.g. a flagellum or axon. [GOC:jl, GOC:mah, http://www.cogsci.princeton.edu/~wn/]	66	0.0407	1.35E-18	5.17E-15
GOBP_GENERATION_OF_NEURONS	1485	The process in which nerve cells are generated. This includes the production of neuroblasts and their differentiation into neurons. [GOC:nln]	62	0.0418	4.74E-18	1.21E-14
GOBP_CELL_MOTILITY	1813	Any process involved in the controlled self-propelled movement of a cell that results in translocation of the cell from one place to another. [GOC:dgh, GOC:dph, GOC:isa_complete, GOC:mlg]	69	0.0381	6.49E-18	1.24E-14
GOBP_NEURON_DEVELOPMENT	1143	The process whose specific outcome is the progression of a neuron over time, from initial commitment of the cell to a specific fate, to the fully functional differentiated cell. [GOC:dph]	53	0.0464	1.94E-17	2.58E-14
GOBP_CELL_ADHESION	1531	The attachment of a cell, either to another cell or to an underlying substrate such as the extracellular matrix, via cell adhesion molecules. [GOC:hb, GOC:pf]	62	0.0405	2.02E-17	2.58E-14
GOBP_CYTOSKELETON_ORGANIZATION	1527	A process that is carried out at the cellular level which results in the assembly, arrangement of constituent parts, or disassembly of cytoskeletal structures. [GOC:dph, GOC:jl, GOC:mah]	59	0.0386	1.06E-15	1.15E-12
GOBP_POSITIVE_REGULATION_OF_CELL_POPULATION_PROLIFERATION	1286	Any process that activates or increases the rate or extent of cell proliferation. [GOC:go_curators]	51	0.0397	3.97E-14	3.79E-11
GOBP_PHOSPHORYLATION	1596	The process of introducing a phosphate group into a molecule, usually with the formation of a phosphoric ester, a phosphoric anhydride or a phosphoric amide. [ISBN:0198506732]	57	0.0357	9.15E-14	7.78E-11
GOBP_POSITIVE_REGULATION_OF_CELLULAR_COMPONENT_ORGANIZATION	1117	Any process that activates or increases the frequency, rate or extent of a process involved in the formation, arrangement of constituent parts, or disassembly of cell structures, including the plasma membrane and any external encapsulating structures such as the cell wall and cell envelope. [GOC:ai]	46	0.0412	2.05E-13	1.57E-10

## Sheet: Reactome
Overlap Results
Collection(s):	CP:REACTOME
# overlaps shown:	10
# genesets in collections:	1692
# genes in comparison (n):	498
# genes in universe (N):	42722
Gene Set Name	# Genes in Gene Set (K)	Description	# Genes in Overlap (k)	k/K	p-value	FDR q-value
REACTOME_DEVELOPMENTAL_BIOLOGY	1257	Developmental Biology	43	0.0342	4.56E-10	7.72E-7
REACTOME_EXTRACELLULAR_MATRIX_ORGANIZATION	300	Extracellular matrix organization	19	0.0633	3.44E-9	2.91E-6
REACTOME_POST_TRANSLATIONAL_PROTEIN_MODIFICATION	1463	Post-translational protein modification	43	0.0294	3.82E-8	2.16E-5
REACTOME_ECM_PROTEOGLYCANS	76	ECM proteoglycans	9	0.1184	2.64E-7	1.12E-4
REACTOME_NERVOUS_SYSTEM_DEVELOPMENT	580	Nervous system development	23	0.0397	4.69E-7	1.56E-4
REACTOME_ASSEMBLY_OF_COLLAGEN_FIBRILS_AND_OTHER_MULTIMERIC_STRUCTURES	61	Assembly of collagen fibrils and other multimeric structures	8	0.1311	5.52E-7	1.56E-4
REACTOME_COLLAGEN_CHAIN_TRIMERIZATION	44	Collagen chain trimerization	7	0.1591	7.4E-7	1.79E-4
REACTOME_COLLAGEN_FORMATION	90	Collagen formation	9	0.1000	1.13E-6	2.14E-4
REACTOME_LAMININ_INTERACTIONS	30	Laminin interactions	6	0.2000	1.14E-6	2.14E-4
REACTOME_ONCOGENIC_MAPK_SIGNALING	82	Oncogenic MAPK signaling	8	0.0976	5.4E-6	8.72E-4
